# Supplementary material for: Dilated Blood and Lymphatic Microvessels, Angiogenesis, Increased Macrophages, and Adipocyte Hypertrophy in Lipedema Thigh Skin and Fat Tissue
Source: Hindawi journal article supplement (doi:10.1155/2019/8747461), 2019-03-03
Supplement: f1 [file 8747461.f1.pdf]

## Supplementary Materials

### Methodology of lymphatic vessel count

Area, perimeter and the aspect ratio of all vessels were measured and averaged for each sample using ImageJ software. Aspect ratio is the longest axis/shortest axis through the calculated center point of the vessel (Figure S1).

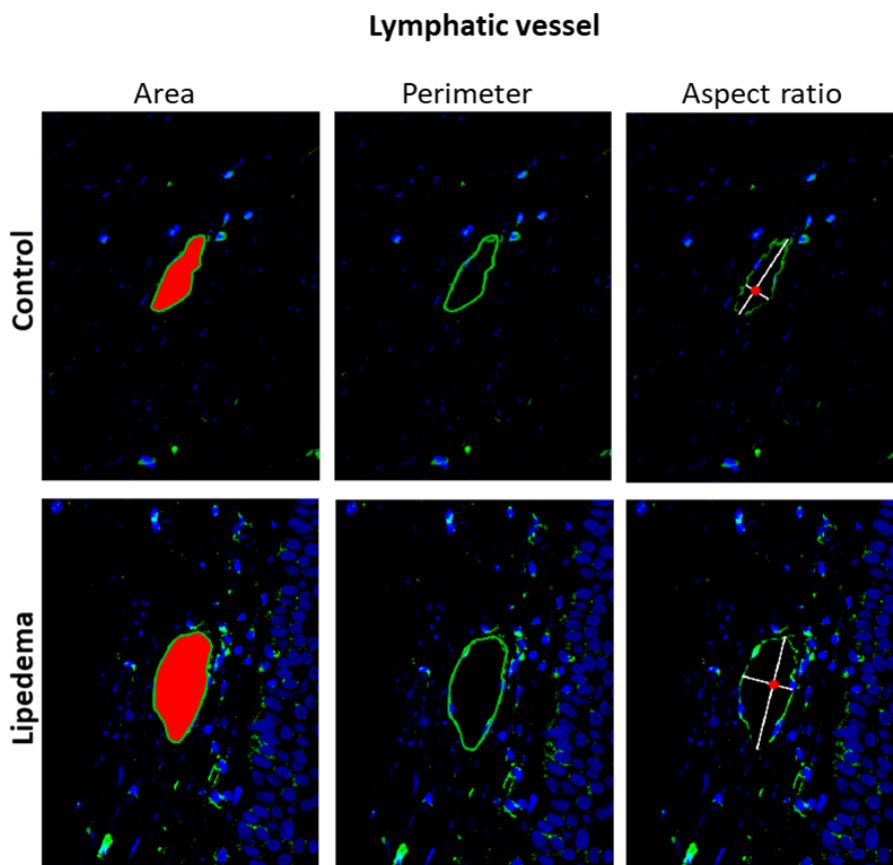

**Supplementary Figure 1:** Methodology of lymphatic vessel measurements. Immunofluorescent images of Lyve-1 staining in human biopsy samples from control and lipedema participants. Images acquired at 20X with 2X digital zoom.

## Adipocyte size

A significant increase in adipocyte size was found in Non-Obese Lipedema compared to Non-Obese Controls (Figure S2). The hypertrophic adipocyte size in Non-Obese participants ranges from greater than 100 to ~ 150 $\mu$ m in diameter in Control and from 100 to ~170  $\mu$ m in Lipedema. In Obese participants, adipocyte size ranges from greater than 100 to ~ 200 $\mu$ m in diameter in both Controls and Lipedema as shown in Figure S2.

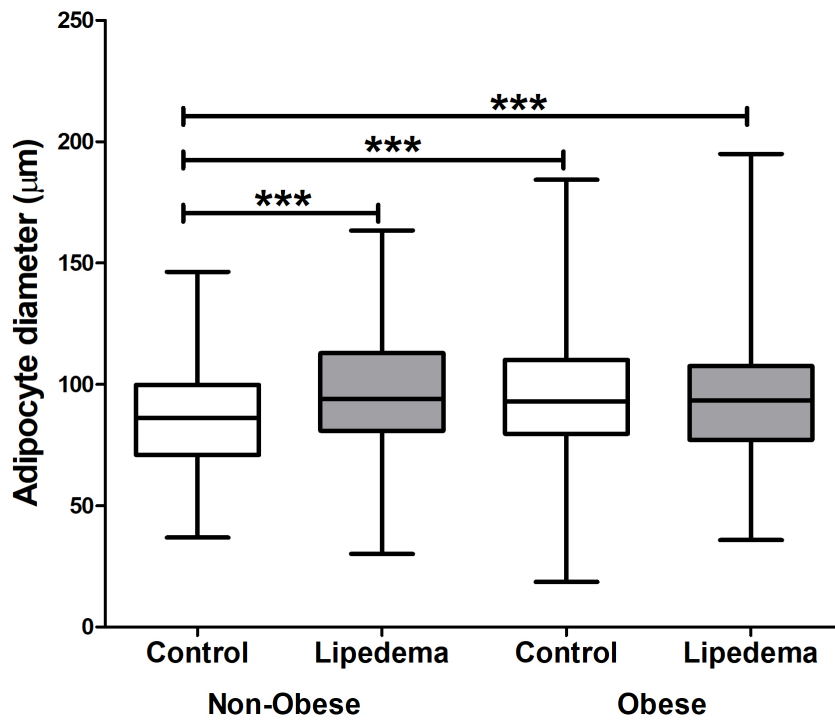

**Supplementary Figure 2:** Adipocyte size in Non-Obese and Obese participants with and without lipedema (controls). Box and whisker plot representing the average adipocyte size in Non-Obese (Control n=10; Lipedema n=10) and Obese groups (Control n=9, Lipedema n=11). Significance between the four groups was determined by One-way ANOVA followed by Tukey's post-hoc test. \*\*\*p<0.001.

## Correlation between number of blood vessels and CD68<sup>+</sup> positive cells in Non-Obese Lipedema participants

The increase in blood vessel numbers positively correlated with macrophage numbers in the Non-Obese Lipedema group using Pearson method (Figures S3).

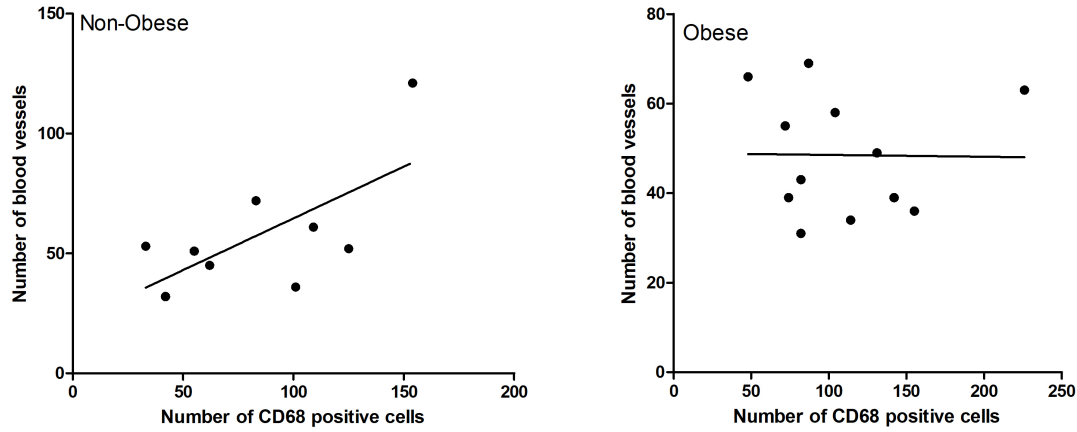

**Supplementary Figure 3:** Correlation between number of blood vessels and CD68<sup>+</sup> positive cells in Non-Obese Lipedema participants.  $p= 0.05$ ,  $r^2=0.44$ .
